# Supplementary material for: The effect of integration of hospitals and post-acute care providers on Medicare payment and patient outcomes
Source: PubMed Central journal article supplement — J Health Econ. Author manuscript; Available in PMC 2018 Sep 21. (PMC6081263; doi:10.1016/j.jhealeco.2018.01.005), 2018-02-07
Supplement: NIHMS961787-supplement-supplement.pdf [file NIHMS961787-supplement-supplement.pdf]

**Online Supplementary Material for:**

**The effect of integration of hospitals and post-acute care providers on Medicare payment and patient outcomes**

R. Tamara Konetzka<sup>a</sup>, Elizabeth A. Stuart<sup>b</sup>, Rachel M. Werner<sup>c,d\*</sup>

<sup>a</sup> Department of Public Health Sciences, University of Chicago

<sup>b</sup> Department of Biostatistics, Johns Hopkins Bloomberg School of Public Health

<sup>c</sup> Division of General Internal Medicine, University of Pennsylvania

<sup>d</sup> Center for Health Equity Research and Promotion, Crescenz VA Medical Center,  
Philadelphia, PA

\*Corresponding author: [rwerner@upenn.edu](mailto:rwerner@upenn.edu)

**Appendix Table 1.** Twenty-five most common DRGs in each PAC setting and percent of patients in each DRG among all patients going to each PAC setting.

| <b>SNF</b>                                                       | <b>%</b> |
|------------------------------------------------------------------|----------|
| Major joint replacement or reattachment of lower extremity (544) | 7.0      |
| Heart failure & shock (127)                                      | 5.2      |
| Septicemia w/o mechanical ventilation 96+ hours (576)            | 4.2      |
| Intracranial hemorrhage or cerebral infarction (14)              | 3.1      |
| Renal failure (316)                                              | 3.1      |
| Simple pneumonia & pleurisy (89)                                 | 2.9      |
| Chronic obstructive pulmonary disease (88)                       | 2.3      |
| Kidney & urinary tract infections (320)                          | 2.3      |
| Hip & femur procedures except major joint (210)                  | 1.9      |
| Kidney & urinary tract infections (321)                          | 1.9      |
| Hip & femur procedures except major joint (211)                  | 1.9      |
| Respiratory infections & inflammations (79)                      | 1.8      |
| Degenerative nervous system disorders (12)                       | 1.6      |
| Nutritional & misc metabolic disorders (296)                     | 1.5      |
| Medical back problems (243)                                      | 1.4      |
| Simple pneumonia & pleurisy (90)                                 | 1.4      |
| Acute myocardial infarction, discharged alive (121)              | 1.3      |
| Nutritional & misc metabolic disorders (297)                     | 1.2      |
| G.I. hemorrhage (174)                                            | 1.1      |
| Fractures of hip & pelvis (236)                                  | 1.1      |
| Pulmonary edema & respiratory failure (87)                       | 1.0      |
| Syncope & collapse (141)                                         | 1.0      |
| Esophagitis, gastroenteritis & misc digest disorders (182)       | 0.9      |
| Cardiac arrhythmia & conduction disorders (138)                  | 0.9      |
| Septicemia age>17 (416)                                          | 0.9      |
| <b>HHA</b>                                                       | <b>%</b> |
| Major joint replacement or reattachment of lower extremity (544) | 10.0     |
| Heart failure & shock (127)                                      | 6.4      |
| Chronic obstructive pulmonary disease (88)                       | 3.8      |
| Simple pneumonia & pleurisy (89)                                 | 2.5      |
| Septicemia w/o mechanical ventilation 96+ hours (576)            | 2.1      |
| Renal failure (316)                                              | 2.1      |
| Intracranial hemorrhage or cerebral infarction (14)              | 2.0      |
| Simple pneumonia & pleurisy (90)                                 | 1.4      |
| Syncope & collapse (141)                                         | 1.3      |
| Kidney & urinary tract infections (321)                          | 1.2      |
| Cardiac arrhythmia & conduction disorders (139)                  | 1.1      |

|                                                                                |     |
|--------------------------------------------------------------------------------|-----|
| Cardiac arrhythmia & conduction disorders (138)                                | 1.1 |
| Acute myocardial infarction, discharged alive (121)                            | 1.1 |
| Kidney & urinary tract infections (320)                                        | 1.1 |
| Cellulitis (278)                                                               | 1.1 |
| Cardiac valve & other major cardiothoracic proc w/o card catheterization (105) | 1.0 |
| Major joint & limb reattachment procedures of lower extremity (209)            | 1.0 |
| Nutritional & misc metabolic disorders (297)                                   | 0.9 |
| Pulmonary edema & respiratory failure (87)                                     | 0.9 |
| Nutritional & misc metabolic disorders (296)                                   | 0.9 |
| Esophagitis, gastroenteritis & misc digest disorders (183)                     | 0.9 |
| Medical back problems (243)                                                    | 0.9 |
| G.I. hemorrhage (174)                                                          | 0.9 |
| Transient ischemia (524)                                                       | 0.8 |
| Esophagitis, gastroenteritis & misc digest disorders (182)                     | 0.8 |

**Appendix Table 2.** Person-level characteristics by differential distance between nearest integrated and nearest non-integrated hospital (for integration with each PAC type)

|                                           | Based on differential distance to closest hospital <u>vertically</u><br><u>integrated</u> with PAC |           |            |           | Based on differential distance to closest hospital <u>informally</u><br><u>integrated</u> with PAC |           |            |           |
|-------------------------------------------|----------------------------------------------------------------------------------------------------|-----------|------------|-----------|----------------------------------------------------------------------------------------------------|-----------|------------|-----------|
|                                           | <u>SNF</u>                                                                                         |           | <u>HHA</u> |           | <u>SNF</u>                                                                                         |           | <u>HHA</u> |           |
|                                           | < median                                                                                           | >= median | < median   | >= median | < median                                                                                           | >= median | < median   | >= median |
| Age                                       | 82.6                                                                                               | 82.6      | 79.4       | 79.1      | 82.5                                                                                               | 82.7      | 79.7       | 78.9      |
| Female                                    | 66.7%                                                                                              | 67.0%     | 62.4%      | 62.2%     | 65.2%                                                                                              | 65.8%     | 62.2%      | 62.4%     |
| Race                                      |                                                                                                    |           |            |           |                                                                                                    |           |            |           |
| -White                                    | 84.0%                                                                                              | 89.3%     | 87.0%      | 86.5%     | 84.5%                                                                                              | 87.8%     | 86.6%      | 86.8%     |
| -Black                                    | 11.0%                                                                                              | 8.0%      | 8.6%       | 8.8%      | 10.4%                                                                                              | 9.5%      | 8.9%       | 8.6%      |
| -Other                                    | 1.1%                                                                                               | 0.6%      | 1.1%       | 1.0%      | 1.1%                                                                                               | 0.6%      | 1.2%       | 1.0%      |
| -Asian                                    | 1.9%                                                                                               | 0.5%      | 1.3%       | 1.1%      | 1.7%                                                                                               | 0.7%      | 1.3%       | 1.1%      |
| -Hispanic                                 | 1.5%                                                                                               | 1.1%      | 1.4%       | 2.0%      | 1.8%                                                                                               | 0.9%      | 1.5%       | 2.0%      |
| -North American Native                    | 0.2%                                                                                               | 0.3%      | 0.3%       | 0.3%      | 0.3%                                                                                               | 0.2%      | 0.2%       | 0.4%      |
| -Unknown                                  | 0.3%                                                                                               | 0.2%      | 0.3%       | 0.3%      | 0.2%                                                                                               | 0.2%      | 0.3%       | 0.3%      |
| Comorbidities, n(%)                       |                                                                                                    |           |            |           |                                                                                                    |           |            |           |
| -Severe Infection                         | 1.4%                                                                                               | 1.3%      | 0.9%       | 1.0%      | 1.4%                                                                                               | 1.3%      | 1.0%       | 1.0%      |
| -Other Infectious Disease &<br>Pneumonias | 30.9%                                                                                              | 31.3%     | 20.1%      | 20.5%     | 31.4%                                                                                              | 30.8%     | 20.5%      | 20.1%     |
| -Metastatic Cancer/Acute Leukemia         | 2.5%                                                                                               | 2.3%      | 2.4%       | 2.4%      | 2.5%                                                                                               | 2.4%      | 2.5%       | 2.3%      |
| -Severe Cancer                            | 4.1%                                                                                               | 4.0%      | 4.3%       | 4.3%      | 4.2%                                                                                               | 4.1%      | 4.4%       | 4.2%      |
| -Other Cancers                            | 5.6%                                                                                               | 5.2%      | 4.9%       | 4.8%      | 5.5%                                                                                               | 5.3%      | 5.1%       | 4.7%      |
| -Diabetes Mellitus                        | 30.9%                                                                                              | 31.1%     | 30.0%      | 30.3%     | 31.4%                                                                                              | 30.7%     | 30.2%      | 30.1%     |
| -Protein-calorie Malnutrition             | 13.2%                                                                                              | 12.8%     | 5.5%       | 6.1%      | 13.4%                                                                                              | 12.7%     | 5.6%       | 6.1%      |
| -End-stage Liver Disease                  | 1.2%                                                                                               | 1.1%      | 0.9%       | 0.9%      | 1.2%                                                                                               | 1.1%      | 0.9%       | 0.9%      |
| -Severe Hematological Disorders           | 1.5%                                                                                               | 1.6%      | 1.4%       | 1.5%      | 1.5%                                                                                               | 1.6%      | 1.4%       | 1.4%      |
| -Alcohol Abuse                            | 2.5%                                                                                               | 2.5%      | 1.1%       | 1.0%      | 2.4%                                                                                               | 2.6%      | 1.1%       | 1.0%      |
| -Psychiatric Comorbidity                  | 24.3%                                                                                              | 26.0%     | 17.4%      | 18.5%     | 27.7%                                                                                              | 25.6%     | 17.8%      | 18.0%     |
| -Hemiplegia, paraplegia, paralysis        | 6.3%                                                                                               | 5.9%      | 2.9%       | 2.9%      | 6.4%                                                                                               | 5.9%      | 3.0%       | 2.8%      |
| -Seizure Disorders                        | 5.3%                                                                                               | 5.0%      | 2.7%       | 2.7%      | 5.2%                                                                                               | 5.1%      | 2.7%       | 2.6%      |
| -Congestive heart failure                 | 26.5%                                                                                              | 26.2%     | 21.2%      | 20.4%     | 26.4%                                                                                              | 26.2%     | 21.7%      | 20.0%     |
| -Coronary atherosclerosis or angina       | 51.4%                                                                                              | 52.3%     | 47.2%      | 47.4%     | 51.8%                                                                                              | 51.2%     | 48.3%      | 46.4%     |
| -Specified arrhythmias                    | 24.6%                                                                                              | 24.5%     | 19.6%      | 19.2%     | 24.5%                                                                                              | 24.7%     | 20.4%      | 18.4%     |
| -Chronic obstructive pulmonary disease    | 29.9%                                                                                              | 30.2%     | 27.9%      | 27.7%     | 30.0%                                                                                              | 30.1%     | 28.1%      | 27.6%     |
| -Other chronic lung disorders             | 3.8%                                                                                               | 3.8%      | 3.9%       | 4.0%      | 3.7%                                                                                               | 3.8%      | 4.1%       | 3.8%      |

|                                                   |       |       |       |       |       |       |       |       |
|---------------------------------------------------|-------|-------|-------|-------|-------|-------|-------|-------|
| -Dialysis                                         | 1.5%  | 1.3%  | 8.8%  | 0.9%  | 1.5%  | 1.4%  | 0.9%  | 0.9%  |
| -Decubitus Ulcer or Chronic Skin Ulcer            | 7.6%  | 6.9%  | 3.5%  | 3.5%  | 7.4%  | 7.1%  | 3.7%  | 3.2%  |
| -Septicemia/Shock                                 | 7.2%  | 6.6%  | 3.0%  | 3.3%  | 7.2%  | 6.6%  | 3.2%  | 3.2%  |
| -Disorders of fluid, electrolytes                 | 29.6% | 30.1% | 19.1% | 19.9% | 30.0% | 29.7% | 19.7% | 19.3% |
| -Iron Deficiency or other anemias                 | 44.0% | 45.3% | 35.4% | 37.4% | 45.1% | 44.2% | 36.1% | 36.7% |
| -Cardiorespiratory Failure or Shock               | 10.4% | 10.8% | 7.2%  | 7.9%  | 10.7% | 10.6% | 7.4%  | 7.7%  |
| -Acute Renal Failure                              | 21.0% | 21.7% | 14.4% | 15.1% | 21.3% | 21.4% | 15.1% | 14.4% |
| -Pancreatic Disease                               | 1.8%  | 1.7%  | 1.6%  | 1.6%  | 1.7%  | 1.7%  | 1.7%  | 1.5%  |
| -Rheumatoid Arthritis                             | 4.1%  | 4.4%  | 4.2%  | 4.4%  | 4.1%  | 4.3%  | 4.3%  | 4.3%  |
| -Respirator Dependence/Tracheostomy               | 0.3%  | 0.3%  | 0.2%  | 0.1%  | 0.3%  | 0.3%  | 0.2%  | 0.1%  |
| -Transplants                                      | 0.2%  | 0.2%  | 0.3%  | 0.3%  | 0.2%  | 0.2%  | 0.3%  | 0.3%  |
| -Coagulation /Hematologic Disorders               | 4.4%  | 4.4%  | 3.1%  | 3.3%  | 4.5%  | 4.4%  | 3.3%  | 3.1%  |
| -Hip Fracture/Dislocation                         | 4.6%  | 4.8%  | 1.5%  | 1.5%  | 4.7%  | 4.6%  | 1.5%  | 1.6%  |
| Six most common reasons for hospitalization, n(%) |       |       |       |       |       |       |       |       |
| -Total knee or hip replacement                    | 12.8% | 13.8% | 20.7% | 23.1% | 13.2% | 13.4% | 19.7% | 24.1% |
| -Sepsis                                           | 8.0%  | 8.1%  | 4.2%  | 4.8%  | 8.3%  | 7.8%  | 4.3%  | 4.7%  |
| -Congestive heart failure                         | 9.8%  | 9.8%  | 14.0% | 13.0% | 9.7%  | 9.9%  | 14.3% | 12.7% |
| -Urinary tract infection                          | 7.8%  | 8.2%  | 4.6%  | 4.8%  | 8.0%  | 7.9%  | 4.6%  | 4.8%  |
| -Hip Fracture                                     | 8.3%  | 8.7%  | 0%    | 0%    | 8.5%  | 8.5%  | 0%    | 0%    |
| -Pneumonia                                        | 8.1%  | 8.2%  | 8.4%  | 7.9%  | 8.2%  | 8.1%  | 8.3%  | 8.0%  |

**Appendix Table 3.** Robustness checks on Medicare payment outcomes

|                                                            |                       | SNF           |                  |             | HHA           |                  |             |
|------------------------------------------------------------|-----------------------|---------------|------------------|-------------|---------------|------------------|-------------|
|                                                            |                       | Total payment | Hospital payment | PAC payment | Total payment | Hospital payment | PAC payment |
| <u>Cohort</u>                                              |                       |               |                  |             |               |                  |             |
| Primary specification                                      | Vertical integration  | 2423.5***     | 149.6            | 2273.9***   | -303.2**      | -261.5**         | -41.7       |
|                                                            |                       | (4.52)        | (0.57)           | (5.16)      | (-2.35)       | (-2.03)          | (-0.94)     |
|                                                            | N of discharges       | 2,651,748     | 2,651,748        | 2,651,748   | 1,318,577     | 1,318,577        | 1,318,577   |
|                                                            | N of provider pairs   | 87,440        | 87,440           | 87,440      | 56,093        | 56,093           | 56,093      |
| Vertically integrated but not informally integrated        | Vertically integrated | 3824.3***     | 320.7            | 3503.6***   | -361.6**      | -257.5           | -104.0      |
|                                                            |                       | (5.31)        | (0.90)           | (5.86)      | (-2.02)       | (-1.37)          | (-1.44)     |
|                                                            | N of discharges       | 2,472,970     | 2,472,970        | 2,472,970   | 10,057,761    | 10,057,762       | 10,057,763  |
|                                                            | N of provider pairs   | 86,999        | 86,999           | 86,999      | 55,590        | 55,590           | 55,590      |
| Most competitive markets                                   | Vertically integrated | 2616.3***     | 186.8            | 2429.5***   | -305.5**      | -266.2*          | -39.3       |
|                                                            |                       | (4.56)        | (0.67)           | (5.14)      | (-2.25)       | (-1.95)          | (-0.85)     |
|                                                            | N of discharges       | 2,502,313     | 2,502,313        | 2,502,313   | 1,244,192     | 1,244,192        | 1,244,192   |
|                                                            | N of provider pairs   | 84,736        | 84,736           | 84,736      | 54,405        | 54,405           | 54,405      |
| Balanced panel of hospital-PAC pairs                       | Vertically integrated | 2938.3***     | 309.1            | 2629.2***   | -261.2**      | -214.1           | -47.1       |
|                                                            |                       | (4.27)        | (0.94)           | (4.63)      | (-2.01)       | (-1.63)          | (-1.06)     |
|                                                            | N of discharges       | 2,212,188     | 2,212,188        | 2,212,188   | 1,052,936     | 1,052,936        | 1,052,936   |
|                                                            | N of provider pairs   | 28,715        | 28,715           | 28,715      | 11,828        | 11,828           | 11,828      |
| All Medicare payments within 60 days as dependent variable | Vertically integrated | 2494.6***     |                  |             | -372.9**      |                  |             |
|                                                            |                       | (4.32)        |                  |             | (-2.06)       |                  |             |
|                                                            | N of discharges       | 2,651,748     |                  |             | 1,318,577     |                  |             |

N of provider pairs                      87,440                                              56,093

**Informal integration**

|                                                     |                       | SNF           |                  |             | HHA           |                  |             |
|-----------------------------------------------------|-----------------------|---------------|------------------|-------------|---------------|------------------|-------------|
| <u>Cohort</u>                                       |                       | Total payment | Hospital payment | PAC payment | Total payment | Hospital payment | PAC payment |
| Primary specification                               | Informally integrated | -204.4        | -326.3***        | 121.8       | 32.4          | 47.1             | -14.71      |
|                                                     |                       | (-1.23)       | (-3.53)          | (0.86)      | (0.54)        | (0.92)           | (-0.63)     |
|                                                     | N of discharges       | 2,651,748     | 2,651,748        | 2,651,748   | 1,318,577     | 1,318,577        | 1,318,577   |
|                                                     | N of provider pairs   | 87,440        | 87,440           | 87,440      | 56,093        | 56,093           | 56,093      |
| Vertically integrated but not informally integrated | Informally integrated | -268.2        | -411.2***        | 142.9       | 4.1           | 60.9             | -56.9       |
|                                                     |                       | (-1.22)       | (-3.71)          | (0.75)      | (0.04)        | (0.71)           | (-1.46)     |
|                                                     | N of discharges       | 2,387,101     | 2,387,101        | 2,387,101   | 1051948       | 1051948          | 1051948     |
|                                                     | N of provider pairs   | 86,895        | 86,895           | 86,895      | 55504         | 55504            | 55504       |
| Most competitive markets                            | Informally integrated | -315.9*       | -359.2***        | 43.31       | 58.5          | 76.0             | -17.5       |
|                                                     |                       | (-1.78)       | (-3.62)          | (0.29)      | (0.92)        | (1.39)           | (-0.70)     |
|                                                     | N of discharges       | 2,502,313     | 2,502,313        | 2,502,313   | 1,244,192     | 1,244,192        | 1,244,192   |
|                                                     | N of provider pairs   | 84,736        | 84,736           | 84,736      | 54,405        | 54,405           | 54,405      |
| Balanced panel of hospital-PAC pairs                | Informally integrated | -363.0*       | -399.8***        | 36.80       | 33.9          | 61.8             | -28.0       |
|                                                     |                       | (-1.92)       | (-3.78)          | (0.23)      | (0.56)        | (1.19)           | (-1.17)     |
|                                                     | N of discharges       | 2,212,188     | 2,212,188        | 2,212,188   | 1,052,936     | 1,052,936        | 1,052,936   |
|                                                     | N of provider pairs   | 28,715        | 28,715           | 28,715      | 11,828        | 11,828           | 11,828      |
| Excluding small hospitals                           | Informally integrated | -126.5        | -309.1***        | 182.6       | -123.4*       | -71.6            | -51.8**     |

|                                                            |                       |           |           |           |           |           |           |
|------------------------------------------------------------|-----------------------|-----------|-----------|-----------|-----------|-----------|-----------|
|                                                            |                       | (-0.77)   | (-2.71)   | (1.39)    | (-1.91)   | (-1.21)   | (-2.06)   |
|                                                            | N of discharges       | 2,453,016 | 2,453,016 | 2,453,016 | 952,926   | 952,926   | 952,926   |
|                                                            | N of provider pairs   | 83,457    | 83,457    | 83,457    | 48,724    | 48,724    | 48,724    |
| <hr/>                                                      |                       |           |           |           |           |           |           |
| Alternative definition of informal integration             | Informally integrated | -240.6    | -198.1**  | -42.5     | -128.3*   | 24.0      | -152.4*** |
|                                                            |                       | (-1.58)   | (-2.31)   | (-0.33)   | (-1.82)   | (0.36)    | (-5.62)   |
|                                                            | N of discharges       | 2,650,900 | 2,650,900 | 2,650,900 | 1,207,015 | 1,207,015 | 1,207,015 |
|                                                            | N of provider pairs   | 87,432    | 87,432    | 87,432    | 55,140    | 55,140    | 55,140    |
| <hr/>                                                      |                       |           |           |           |           |           |           |
| All Medicare payments within 60 days as dependent variable | Informally integrated | -182.9    |           |           | 19.8      |           |           |
|                                                            |                       | (-0.91)   |           |           | (0.20)    |           |           |
|                                                            | N of discharges       | 2,651,748 |           |           | 1,318,577 |           |           |
|                                                            | N of provider pairs   | 87,440    |           |           | 56,093    |           |           |

Note: Regression includes all the covariates reported in Table 3, a full set of DRG controls, hospital-PAC-pair fixed effects, and year fixed effects.

Robust t-statistics in parentheses

\* p<0.10 \*\* p<0.05 \*\*\*p<0.01



**Appendix Table 4.** Robustness checks on length of stay outcomes

**Vertical integration**

|                                                     |                       | SNF               |                    |                   | HHA                 |                   |                     |
|-----------------------------------------------------|-----------------------|-------------------|--------------------|-------------------|---------------------|-------------------|---------------------|
| <u>Cohort</u>                                       |                       | Total LOS         | Hospital LOS       | PAC LOS           | Total LOS           | Hospital LOS      | PAC LOS             |
| Primary specification                               | Vertical integration  | 3.9***<br>(3.42)  | -0.7***<br>(-2.70) | 4.6***<br>(4.13)  | -1.1*<br>(-1.95)    | -0.1<br>(-1.28)   | -1.0*<br>(-1.78)    |
|                                                     | N of discharges       | 2,651,748         | 2,651,748          | 2,651,748         | 1,318,577           | 1,318,577         | 1,318,577           |
|                                                     | N of provider pairs   | 87,440            | 87,440             | 87,440            | 56,093              | 56,093            | 56,093              |
|                                                     |                       |                   |                    |                   |                     |                   |                     |
| Vertically integrated but not informally integrated | Vertically integrated | 5.2***<br>(3.38)  | -1.0***<br>(-2.72) | 6.2***<br>(4.11)  | -1.3<br>(-1.57)     | -0.03<br>(-0.22)  | -1.3<br>(-1.57)     |
|                                                     | N of discharges       | 2,472,970         | 2,472,970          | 2,472,970         | 1,033,033           | 1,033,033         | 1,033,033           |
|                                                     | N of provider pairs   | 86,999            | 86,999             | 86,999            | 55,590              | 55,590            | 55,590              |
|                                                     |                       |                   |                    |                   |                     |                   |                     |
| Most competitive markets                            | Vertically integrated | 4.5***<br>(3.73)  | -0.8***<br>(-2.76) | 5.4***<br>(4.45)  | -1.1*<br>(-1.88)    | -0.1<br>(-1.56)   | -0.9*<br>(-1.67)    |
|                                                     | N of discharges       | 2,502,313         | 2,502,313          | 2,502,313         | 1,244,192           | 1,244,192         | 1,244,192           |
|                                                     | N of provider pairs   | 84,736            | 84,736             | 84,736            | 54,405              | 54,405            | 54,405              |
|                                                     |                       |                   |                    |                   |                     |                   |                     |
| Balanced panel of hospital-PAC pairs                | Vertically integrated | 4.6***<br>(3.10)  | -0.7**<br>(-2.05)  | 5.3***<br>(3.64)  | -1.3**<br>(-2.32)   | -0.1*<br>(-1.77)  | -1.1**<br>(-2.08)   |
|                                                     | N of discharges       | 2,212,188         | 2,212,188          | 2,212,188         | 1,052,936           | 1,052,936         | 1,052,936           |
|                                                     | N of provider pairs   | 28,715            | 28,715             | 28,715            | 11,828              | 11,828            | 11,828              |
|                                                     |                       |                   |                    |                   |                     |                   |                     |
| Using negative binomial model                       | Vertically integrated | 0.4***<br>(16.46) | -0.3***<br>(-8.98) | 0.4***<br>(14.55) | -0.04***<br>(-4.79) | -0.02*<br>(-1.87) | -0.04***<br>(-4.26) |
|                                                     | N of discharges       | 2,626,214         | 2,626,214          | 2,626,214         | 1,299,442           | 1,299,442         | 1,299,442           |
|                                                     |                       |                   |                    |                   |                     |                   |                     |

**Informal integration**

|                                                     |                       | SNF               |                  |                   | HHA                |                  |                    |
|-----------------------------------------------------|-----------------------|-------------------|------------------|-------------------|--------------------|------------------|--------------------|
| <u>Cohort</u>                                       |                       | Total LOS         | Hospital LOS     | PAC LOS           | Total LOS          | Hospital LOS     | PAC LOS            |
| Primary specification                               | Informally integrated | -0.8**<br>(-2.09) | -0.1<br>(-1.48)  | -0.6*<br>(-1.78)  | -0.4<br>(-1.43)    | -0.02<br>(-0.48) | -0.4<br>(-1.35)    |
|                                                     | N of discharges       | 2,651,748         | 2,651,748        | 2,651,748         | 1,318,577          | 1,318,577        | 1,318,577          |
|                                                     | N of provider pairs   | 87,440            | 87,440           | 87,440            | 56,093             | 56,093           | 56,093             |
|                                                     |                       |                   |                  |                   |                    |                  |                    |
| Vertically integrated but not informally integrated | Informally integrated | -0.9*<br>(-1.72)  | -0.2<br>(-1.49)  | -0.7<br>(-1.37)   | -1.4***<br>(-3.01) | -0.03<br>(-0.31) | -1.3***<br>(-2.96) |
|                                                     | N of discharges       | 2,387,101         | 2,387,101        | 2,387,101         | 1,051,948          | 1,051,948        | 1,051,948          |
|                                                     | N of provider pairs   | 86,895            | 86,895           | 86,895            | 55,504             | 55,504           | 55,504             |
|                                                     |                       |                   |                  |                   |                    |                  |                    |
| Most competitive markets                            | Informally integrated | -0.6<br>(-1.59)   | -0.1<br>(-1.41)  | -0.5<br>(-1.27)   | -0.03<br>(-0.08)   | -0.02<br>(-0.42) | -0.4<br>(-1.44)    |
|                                                     | N of discharges       | 2502313           | 2502313          | 2502313           | 1,244,192          | 1,244,192        | 1,244,192          |
|                                                     | N of provider pairs   | 84736             | 84736            | 84736             | 54,405             | 54,405           | 54,405             |
|                                                     |                       |                   |                  |                   |                    |                  |                    |
| Balanced panel of hospital-PAC pairs                | Informally integrated | -0.9**<br>(-2.16) | -0.1<br>(-1.14)  | -0.8*<br>(-1.95)  | -0.3<br>(-1.11)    | -0.02<br>(-0.42) | -0.3<br>(-1.04)    |
|                                                     | N of discharges       | 2212188           | 2212188          | 2212188           | 1,052,936          | 1,052,936        | 1,052,936          |
|                                                     | N of provider pairs   | 28715             | 28715            | 28715             | 11,828             | 11,828           | 11,828             |
|                                                     |                       |                   |                  |                   |                    |                  |                    |
| Excluding small hospitals                           | Informally integrated | -0.7**<br>(-2.00) | -0.01<br>(-0.15) | -0.7**<br>(-2.04) | -0.7**<br>(-2.32)  | 0.02<br>(0.30)   | -0.7**<br>(-2.36)  |
|                                                     | N of discharges       | 2453016           | 2453016          | 2453016           | 952,926            | 952,926          | 952,926            |

|                                                |                       |                    |                  |                    |                      |                  |                     |
|------------------------------------------------|-----------------------|--------------------|------------------|--------------------|----------------------|------------------|---------------------|
|                                                | N of provider pairs   | 83457              | 83457            | 83457              | 48,724               | 48,724           | 48,724              |
| Alternative definition of informal integration | Informally integrated | -1.6***<br>(-4.66) | -0.2*<br>(-1.86) | -1.5***<br>(-4.33) | -1.2***<br>(-3.51)   | -0.01<br>(-0.25) | -1.2***<br>(-3.51)  |
|                                                | N of discharges       | 2,650,900          | 2,650,900        | 2,650,900          | 1,207,015            | 1,207,015        | 1,207,015           |
|                                                | N of provider pairs   | 87,432             | 87,432           | 87,432             | 55,140               | 55,140           | 55,140              |
| Using negative binomial model                  | Informally integrated | -0.02**<br>(-2.10) | -0.01<br>(-0.87) | -0.02*<br>(-1.77)  | -0.08***<br>(-13.37) | -0.01<br>(-1.60) | -0.1***<br>(-15.63) |
|                                                | N of discharges       | 2,626,214          | 2,626,214        | 2,626,214          | 1,299,442            | 1,299,442        | 1,299,442           |
|                                                | N of provider pairs   |                    |                  |                    |                      |                  |                     |

Note: Regression includes all the covariates reported in Table 3, a full set of DRG controls, hospital-PAC-pair fixed effects, and year fixed effects.

Robust t-statistics in parentheses

\* p<0.10 \*\* p<0.05 \*\*\*p<0.01

**Appendix Table 5.** Robustness checks on rehospitalization or death outcomes

| <b><u>Vertical integration</u></b>                  |                      |                     |                   |
|-----------------------------------------------------|----------------------|---------------------|-------------------|
| <u>Cohort</u>                                       |                      | SNF                 | HHA               |
| Primary specification                               | Vertical integration | -0.054**<br>(-1.96) | -0.004<br>(-0.49) |
|                                                     | N of discharges      | 2,651,748           | 1,318,577         |
|                                                     | N of provider pairs  | 87,440              | 56,093            |
| Vertically integrated but not informally integrated | Vertical integration | -0.063*<br>(-1.65)  | -0.012<br>(-0.94) |
|                                                     | N of discharges      | 24,729,70           | 1,033,033         |
|                                                     | N of provider pairs  | 86999               | 55590             |
| Most competitive markets                            | Vertical integration | -0.070**<br>(-2.37) | -0.006<br>(-0.76) |
|                                                     | N of discharges      | 2,502,313           | 1,244,192         |
|                                                     | N of provider pairs  | 84,736              | 54,405            |
| Balanced panel of hospital-PAC pairs                | Vertical integration | -0.062*<br>(-1.75)  | -0.005<br>(-0.59) |
|                                                     | N of discharges      | 2,212,188           | 1,052,936         |
|                                                     | N of provider pairs  | 28,715              | 11,828            |
| <b><u>Informal integration</u></b>                  |                      |                     |                   |
| <u>Cohort</u>                                       |                      | SNF                 | HHA               |
| Primary specification                               | Informal integration | 0.005<br>(0.54)     | -0.002<br>(-0.47) |
|                                                     | N of discharges      | 2,651,748           | 1,318,577         |
|                                                     | N of provider pairs  | 87,440              | 56,093            |
| Vertically integrated but not informally integrated | Informal integration | 0.0001<br>(0.01)    | -0.007<br>(-0.84) |
|                                                     | N of discharges      | 2,387,101           | 1,051,948         |
|                                                     | N of provider pairs  | 86,895              | 55,504            |
| Six most common DRGs                                | Informal integration | 0.006<br>(0.47)     | -0.001<br>(-0.20) |
|                                                     | N of discharges      | 1,282,965           | 757,073           |

|                                                |                      |                   |                   |
|------------------------------------------------|----------------------|-------------------|-------------------|
|                                                | N of provider pairs  | 67,936            | 44,349            |
| Most competitive markets                       | Informal integration | 0.004<br>(0.45)   | -0.001<br>(-0.26) |
|                                                | N of discharges      | 2,502,313         | 1,244,192         |
|                                                | N of provider pairs  | 84,736            | 54,405            |
|                                                |                      |                   |                   |
| Balanced panel of hospital-PAC pairs           | Informal integration | 0.004<br>(0.38)   | -0.001<br>(-0.11) |
|                                                | N of discharges      | 2,212,188         | 1,052,936         |
|                                                | N of provider pairs  | 28,715            | 11,828            |
|                                                |                      |                   |                   |
| Alternative definition of informal integration | Informal integration | 0.008<br>(0.93)   | 0.002<br>(0.29)   |
|                                                | N of discharges      | 2,650,900         | 1,207,015         |
|                                                | N of provider pairs  | 87,432            | 55,140            |
|                                                |                      |                   |                   |
| Excluding small hospitals                      | Informal integration | -0.001<br>(-0.11) | -0.000<br>(-0.09) |
|                                                | N of discharges      | 2,453,016         | 1,201,838         |
|                                                | N of provider pairs  | 83,457            | 49,325            |
|                                                |                      |                   |                   |

Note: Regression includes all the covariates reported in Table 3, a full set of DRG controls, hospital-PAC-pair fixed effects, and year fixed effects.

Robust t-statistics in parentheses

\* p<0.10 \*\* p<0.05 \*\*\*p<0.01
